# Supplementary material for: Targeting the mitochondrial trifunctional protein restrains tumor growth in oxidative lung carcinomas
Source: JCI journal article supplement (doi:10.1172/jci133081), 2021-01-03

**A**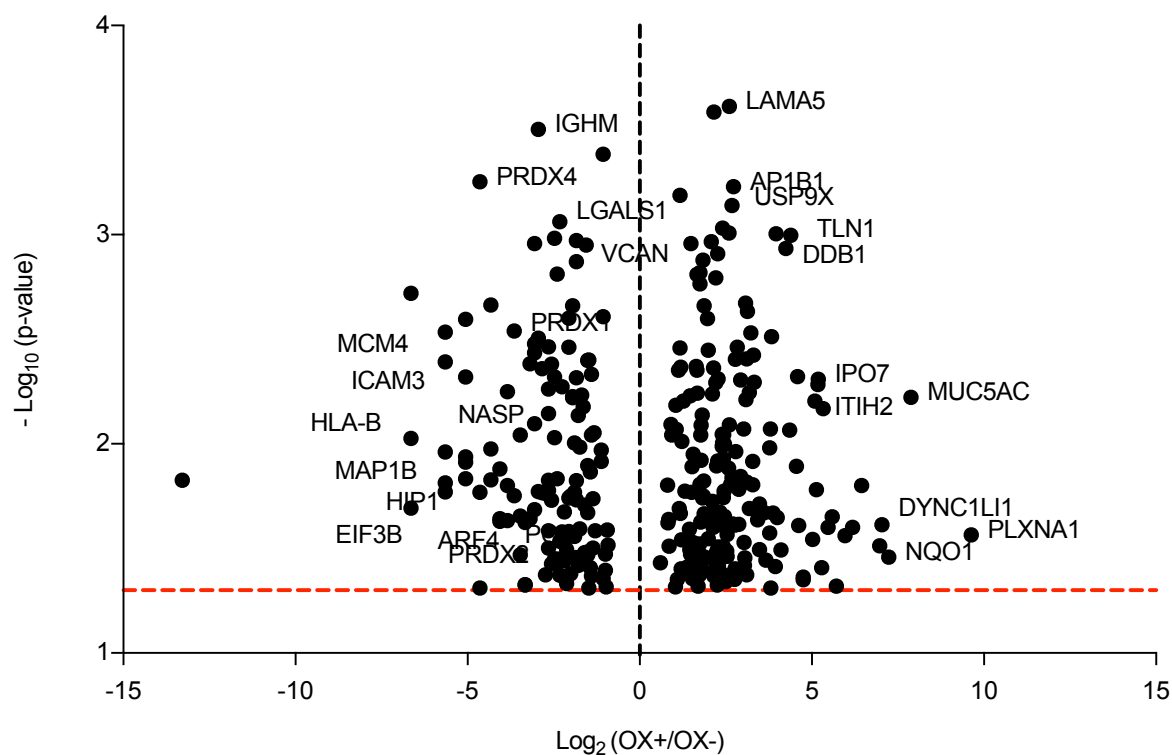**B**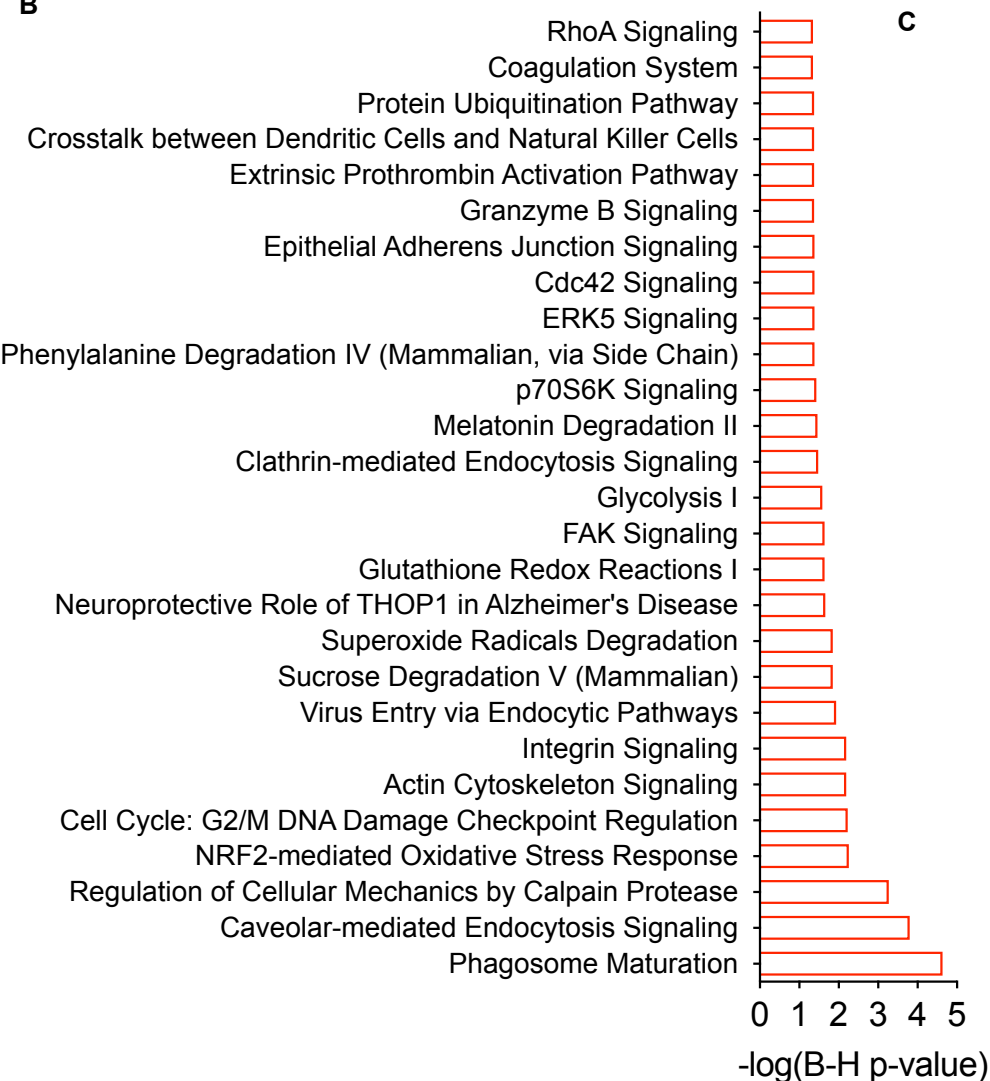**C**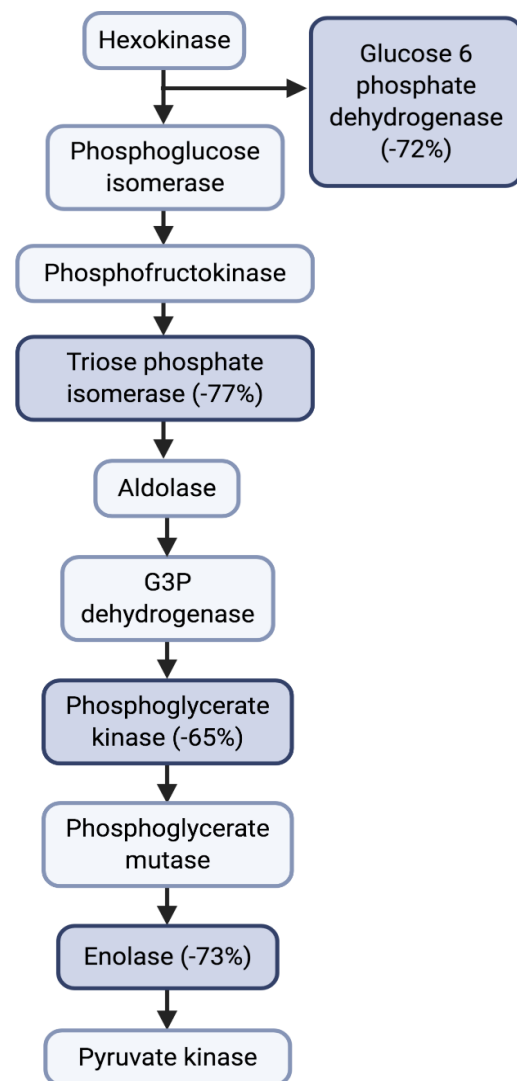

**Figure S1: Proteomic comparison of PZ<sub>OX+</sub> and PZ<sub>OX-</sub> LUAD tumors. A)** Comparative proteomics between PZ<sub>OX+</sub> and PZ<sub>OX-</sub> tumors using label free proteomics. The proteins that differed between the two groups are shown in the Volcano plot (Anova;  $p < 0.05$ ). **B)** The cellular functions associated with the proteins differentially expressed in PZ<sub>OX+</sub> versus PZ<sub>OX-</sub> were analyzed using IPA (Qiagen) and ranked by significance (Fisher's Exact Test with multiple corrections). **C)** Glucose metabolizing proteins downregulated in OX+ LUADs. The reduction is shown as percentage of inhibition (PZ<sub>OX-</sub> as % of PZ<sub>OX+</sub>).

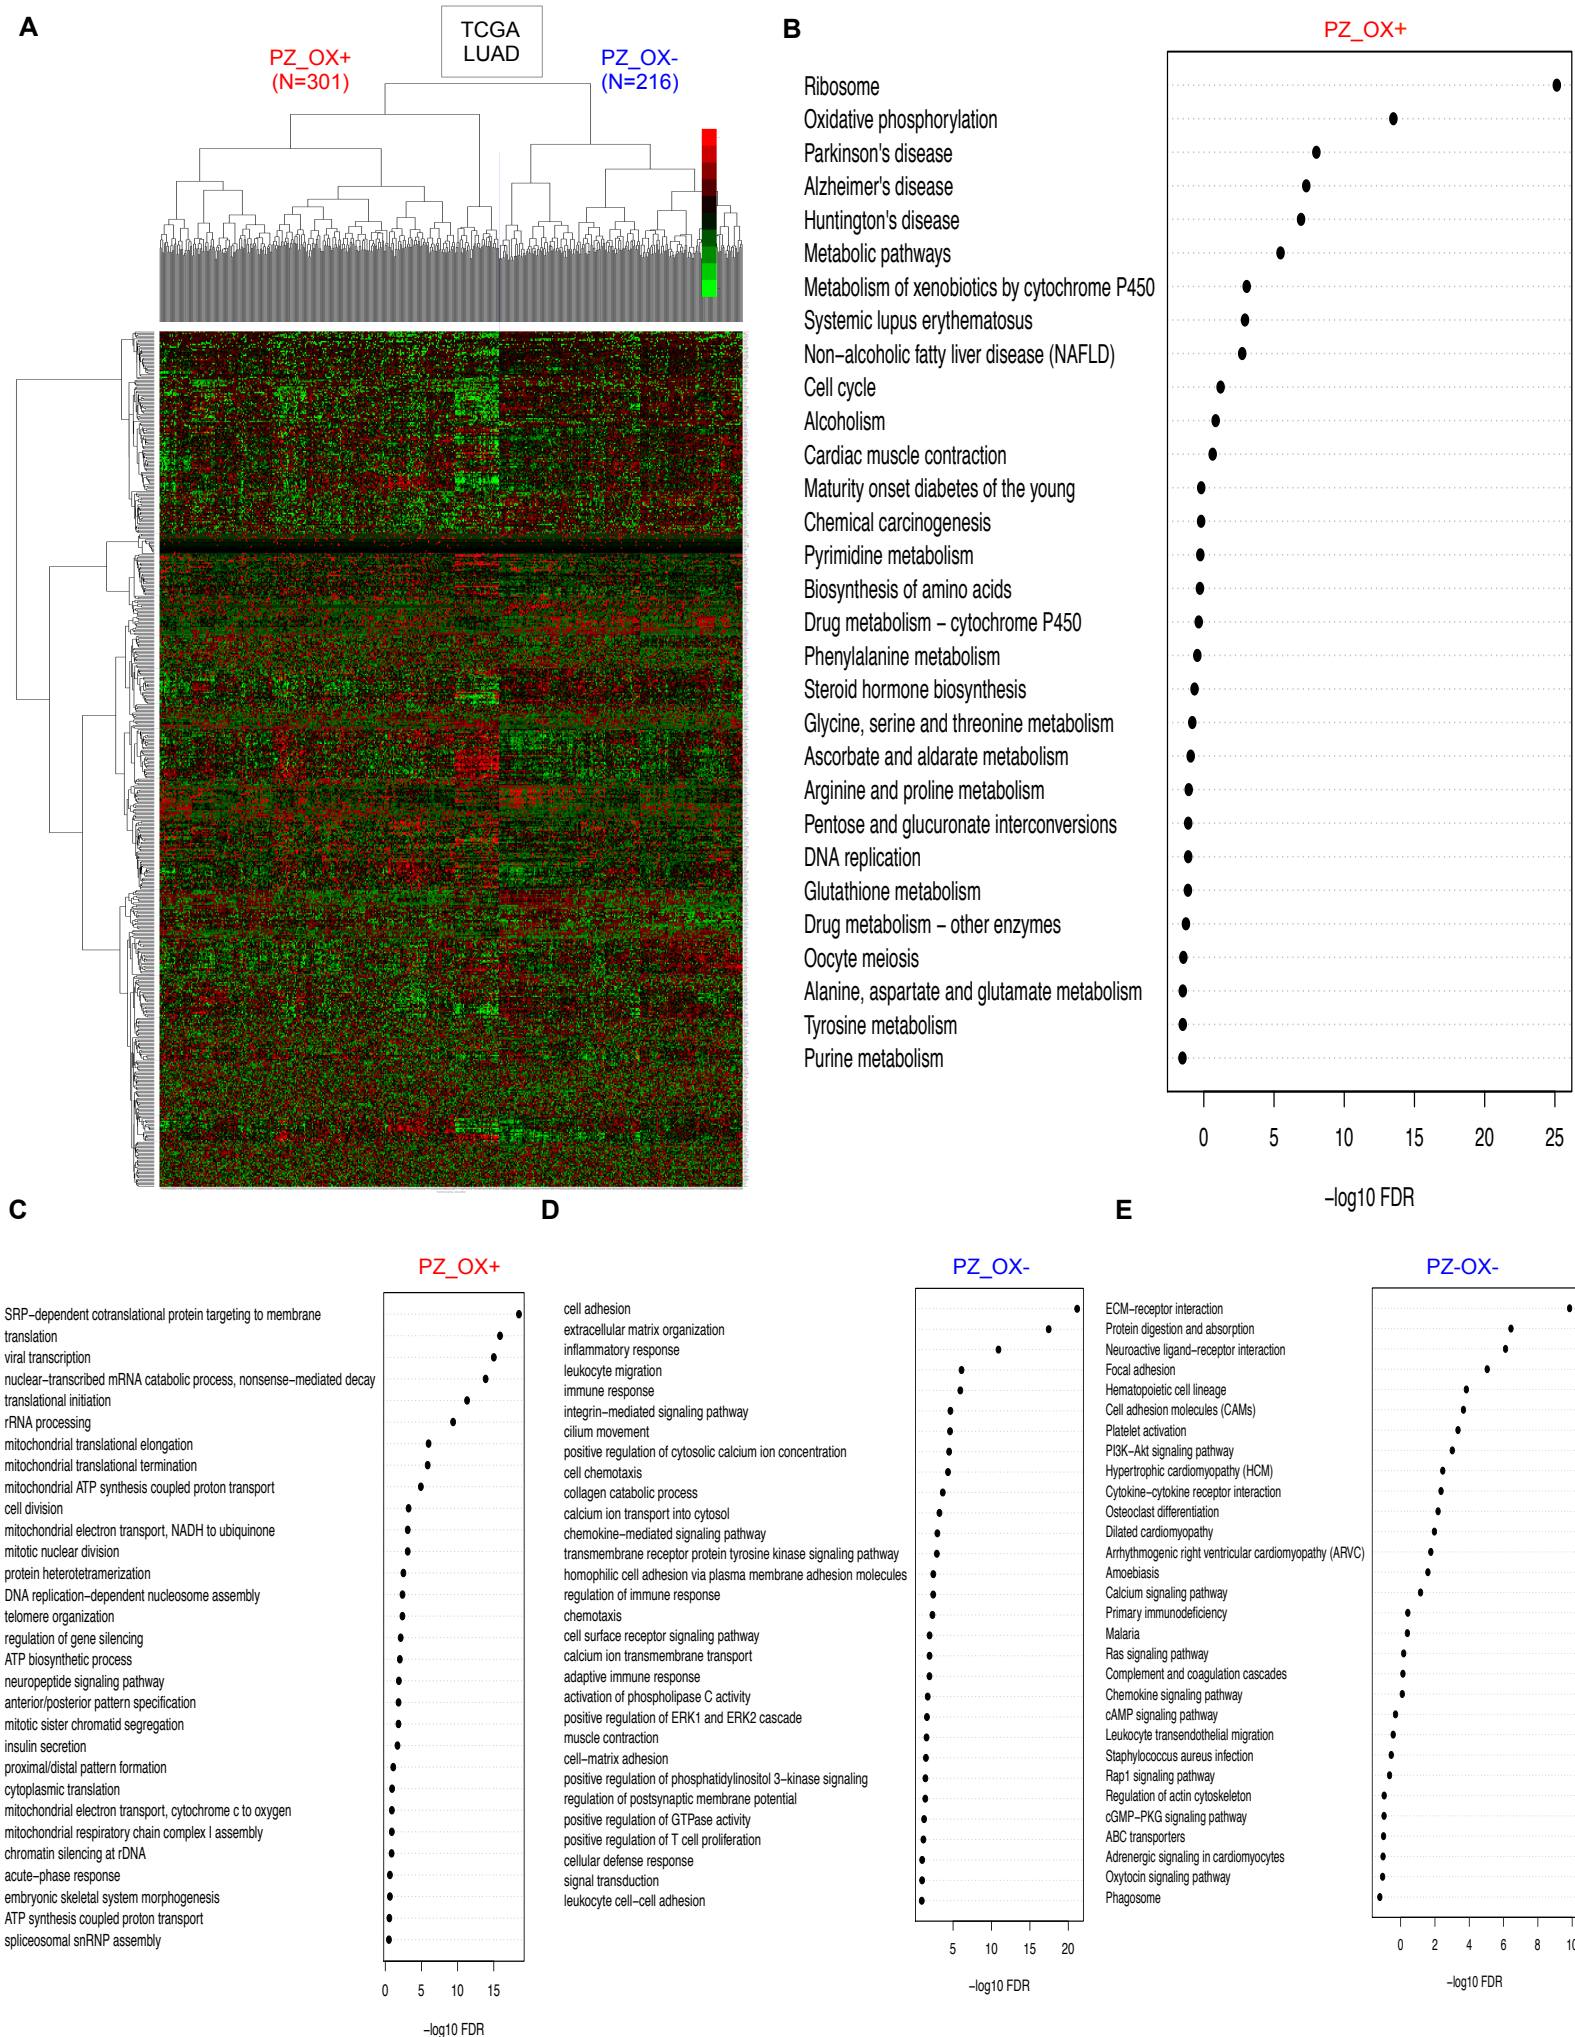

**Figure S2: A)** Hierarchical clustering of the TCGA-LUAD RNAseq data available from the Genomic Data Commons Portal (<https://portal.gdc.cancer.gov/>) using the full proteomic signature of oxidative tumors (OX\*PZ/OX-PZ) determined from Figure S1A). **B)** Top 30 KEGG pathways and **C)** GO terms enriched in PZ\_OX+ LUAD tumors. **D)** Top 30 KEGG pathways and **E)** GO terms enriched in PZ\_OX- LUAD tumors. For **B-E**, differential expression analysis was performed on TCGA RNA-Seq data using DESeq2 between OX+ and OX- LUAD tumors and genes were selected based on adjusted p-value (<0.05) and fold-change (>1.5). DESeq2 compares groups using a Wald test followed by a Bonferroni multiple test correction.

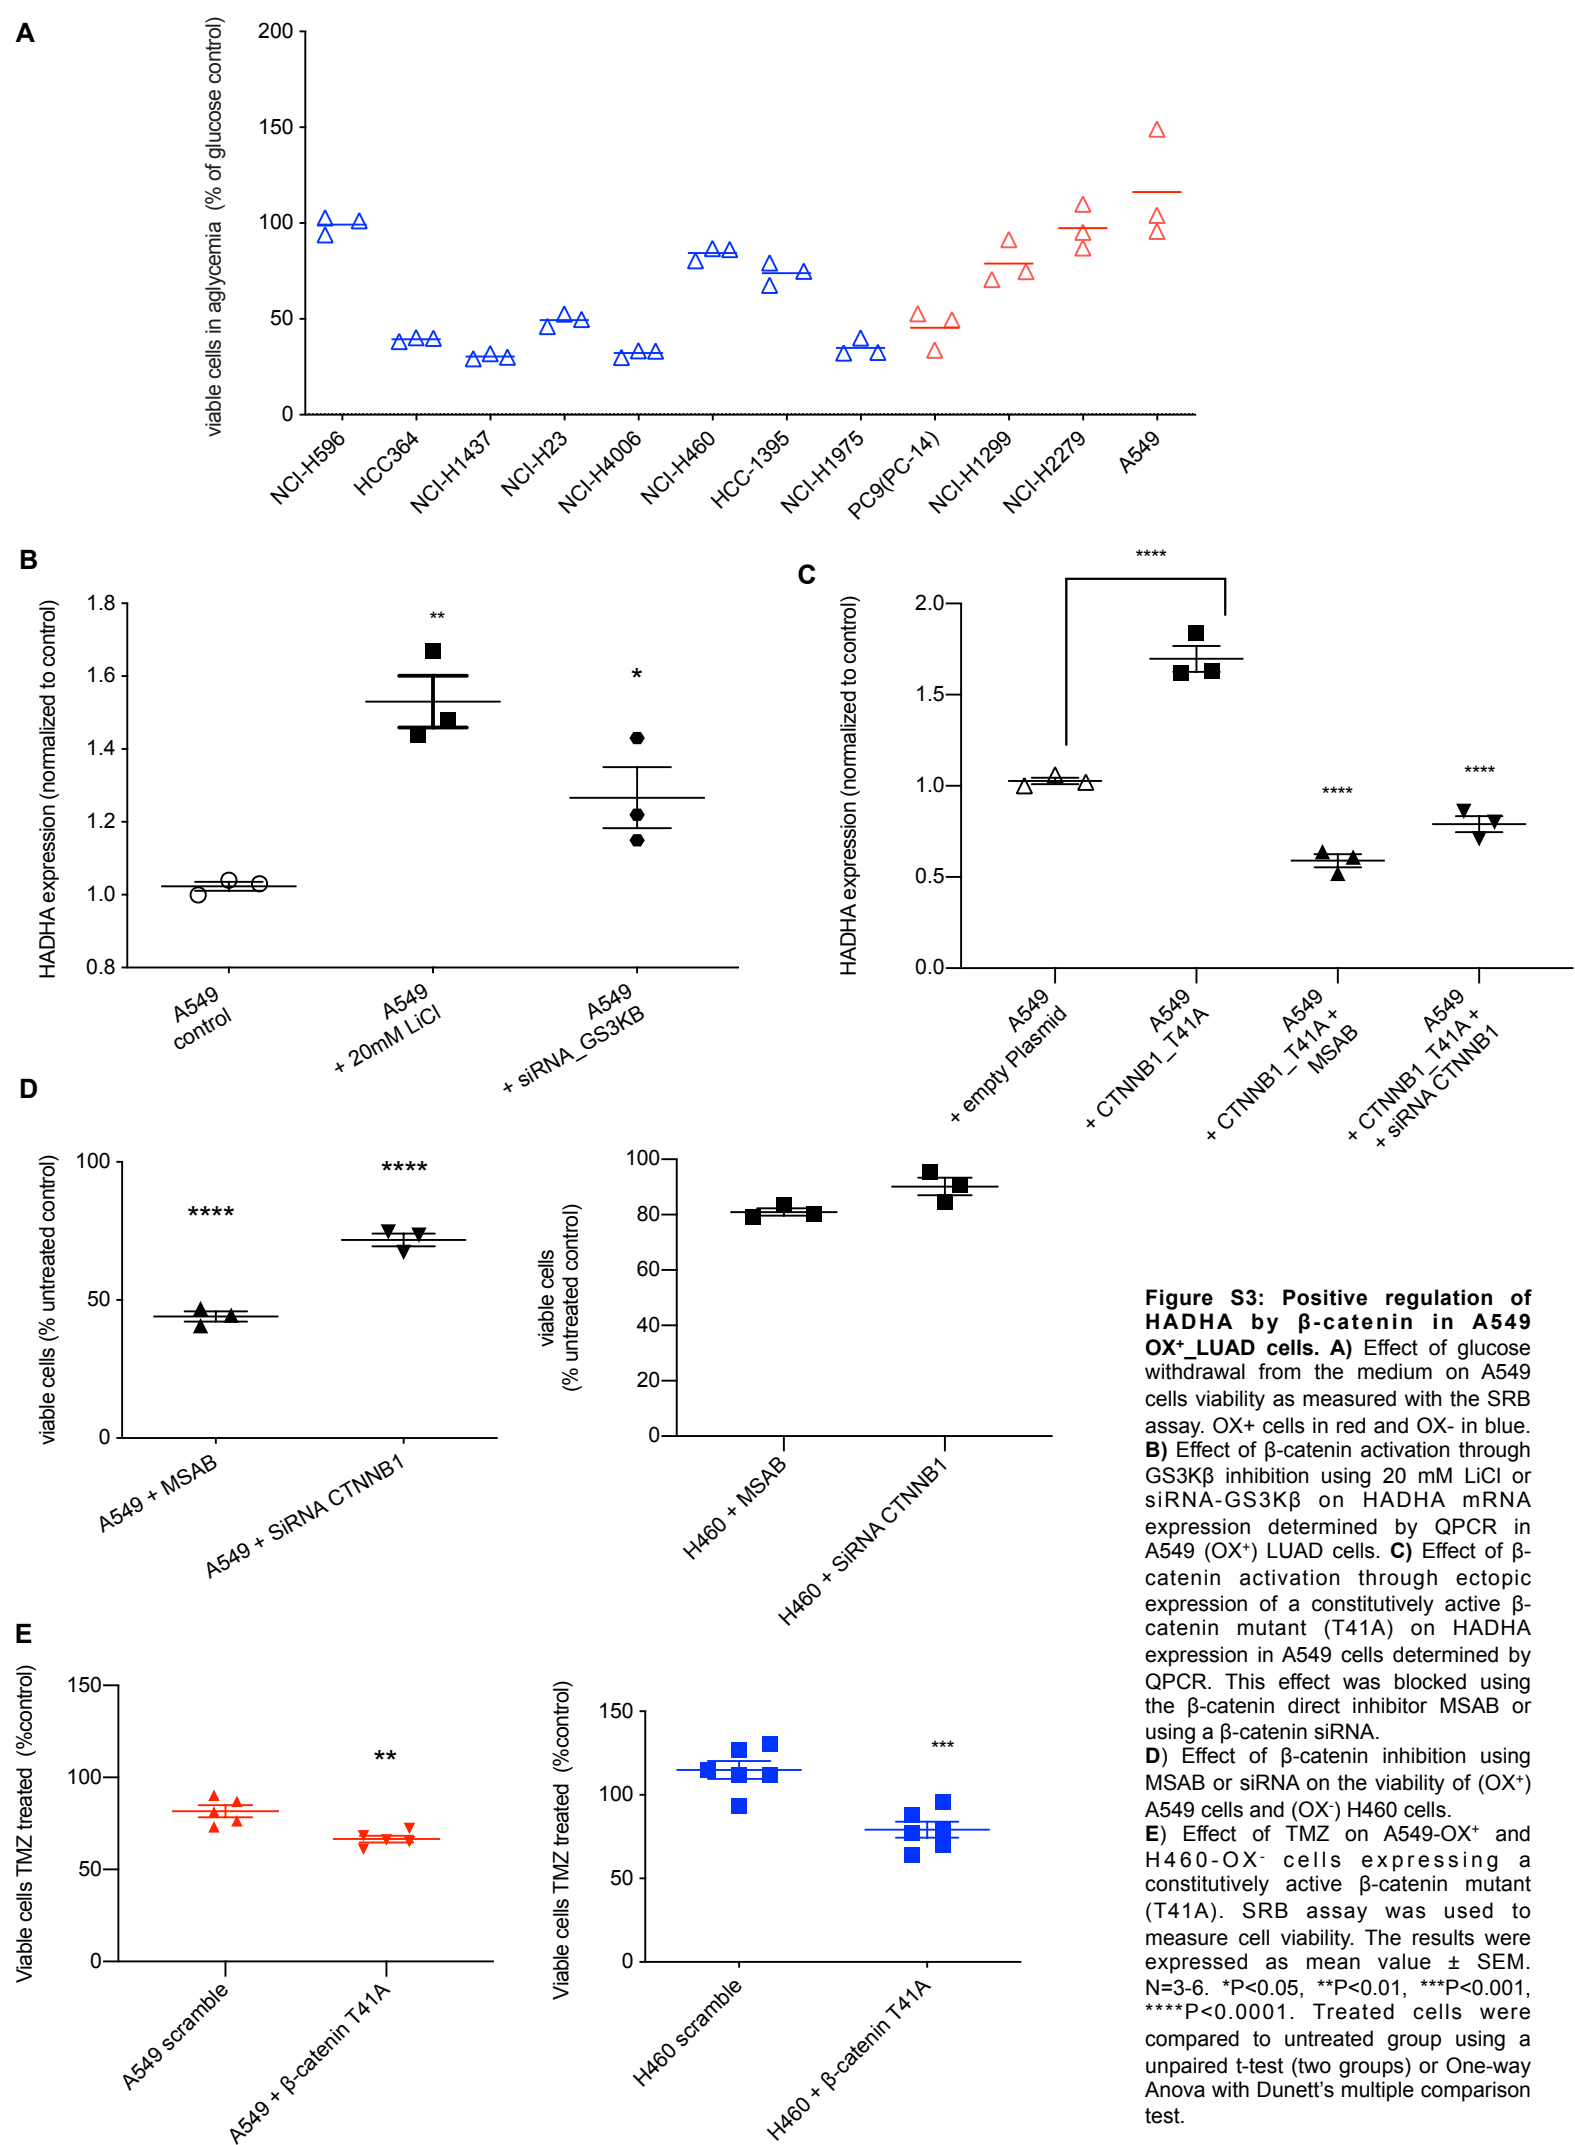

**Figure S3: Positive regulation of HADHA by  $\beta$ -catenin in A549 OX<sup>+</sup> LUAD cells.** **A)** Effect of glucose withdrawal from the medium on A549 cells viability as measured with the SRB assay. OX<sup>+</sup> cells in red and OX<sup>-</sup> in blue. **B)** Effect of  $\beta$ -catenin activation through GS3K $\beta$  inhibition using 20 mM LiCl or siRNA-GS3K $\beta$  on HADHA mRNA expression determined by QPCR in A549 (OX<sup>+</sup>) LUAD cells. **C)** Effect of  $\beta$ -catenin activation through ectopic expression of a constitutively active  $\beta$ -catenin mutant (T41A) on HADHA expression in A549 cells determined by QPCR. This effect was blocked using the  $\beta$ -catenin direct inhibitor MSAB or using a  $\beta$ -catenin siRNA. **D)** Effect of  $\beta$ -catenin inhibition using MSAB or siRNA on the viability of (OX<sup>+</sup>) A549 cells and (OX<sup>-</sup>) H460 cells. **E)** Effect of TMZ on A549-OX<sup>+</sup> and H460-OX<sup>-</sup> cells expressing a constitutively active  $\beta$ -catenin mutant (T41A). SRB assay was used to measure cell viability. The results were expressed as mean value  $\pm$  SEM. N=3-6. \*P<0.05, \*\*P<0.01, \*\*\*P<0.001, \*\*\*\*P<0.0001. Treated cells were compared to untreated group using a unpaired t-test (two groups) or One-way Anova with Dunett's multiple comparison test.

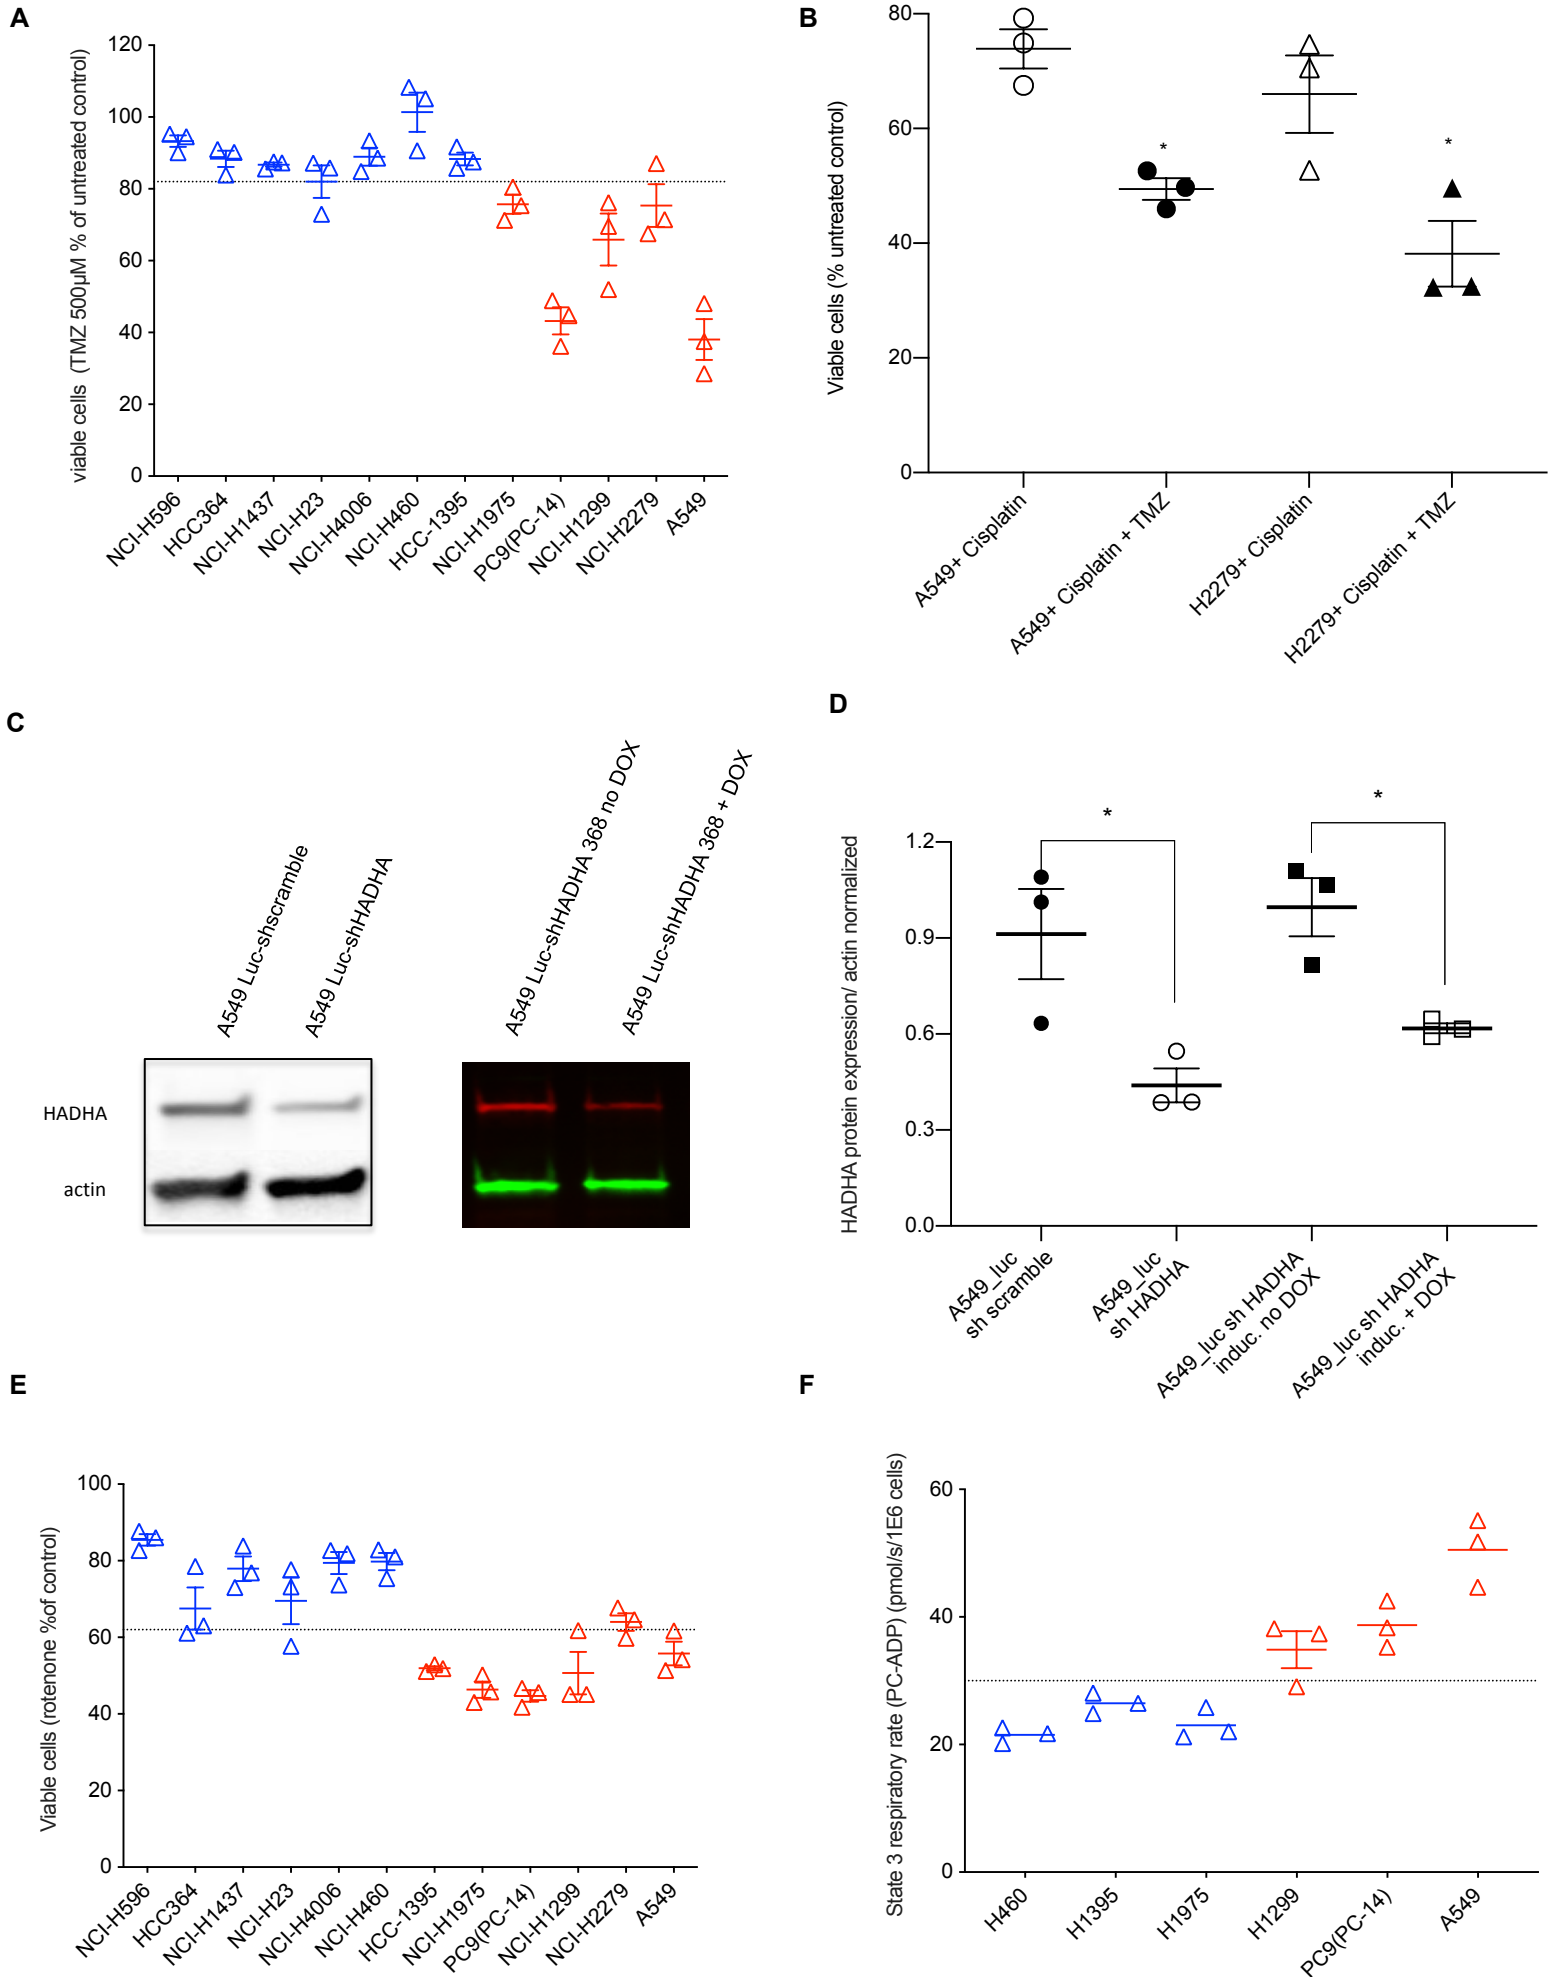

**Figure S4: Pharmacological inhibition of HADHA in twelve NSCLC cancer cell lines.** (A) The effect of HADHA inhibition by 500µM TMZ (24H) in OX+/HADHA+ (red) and OX-/HADHA- (blue) lung cancer cell lines was determined by measuring cell viability using the SRB assay. (B) Effect of TMZ 500µM in co-treatment with Cisplatin 30µM for 48H on cell viability. (C) HADHA knock-down by shHADHA or by doxycycline (DOX) inducible shHADHA verified by western blot. (D) Western blot quantification of HADHA levels as normalized to actin level. (E) Effect of rotenone treatment on OX+ (red) and OX- (blue) NSCLC cell lines. (F) Rate of fatty-acid oxidation coupled to OXPHOS measured by high-resolution respirometry on permeabilized human lung cancer cells fueled with palmitoyl-carnitine (PC) and ADP. Cells with low capacity of palmitoyl-carnitine oxidation are shown in blue (OX-) and cells with high capacity (OX+) are shown in red. The dashed line shows the median value of palmitate fueled coupled respiration. The data are expressed as the mean value  $\pm$  SEM. N=3. \*P<0.05, \*\*P<0.01, \*\*\*P<0.001, \*\*\*\*P<0.0001. The groups were comparing using a unpaired t-test (two groups) or One-way Anova with Dunett's multiple comparison test.



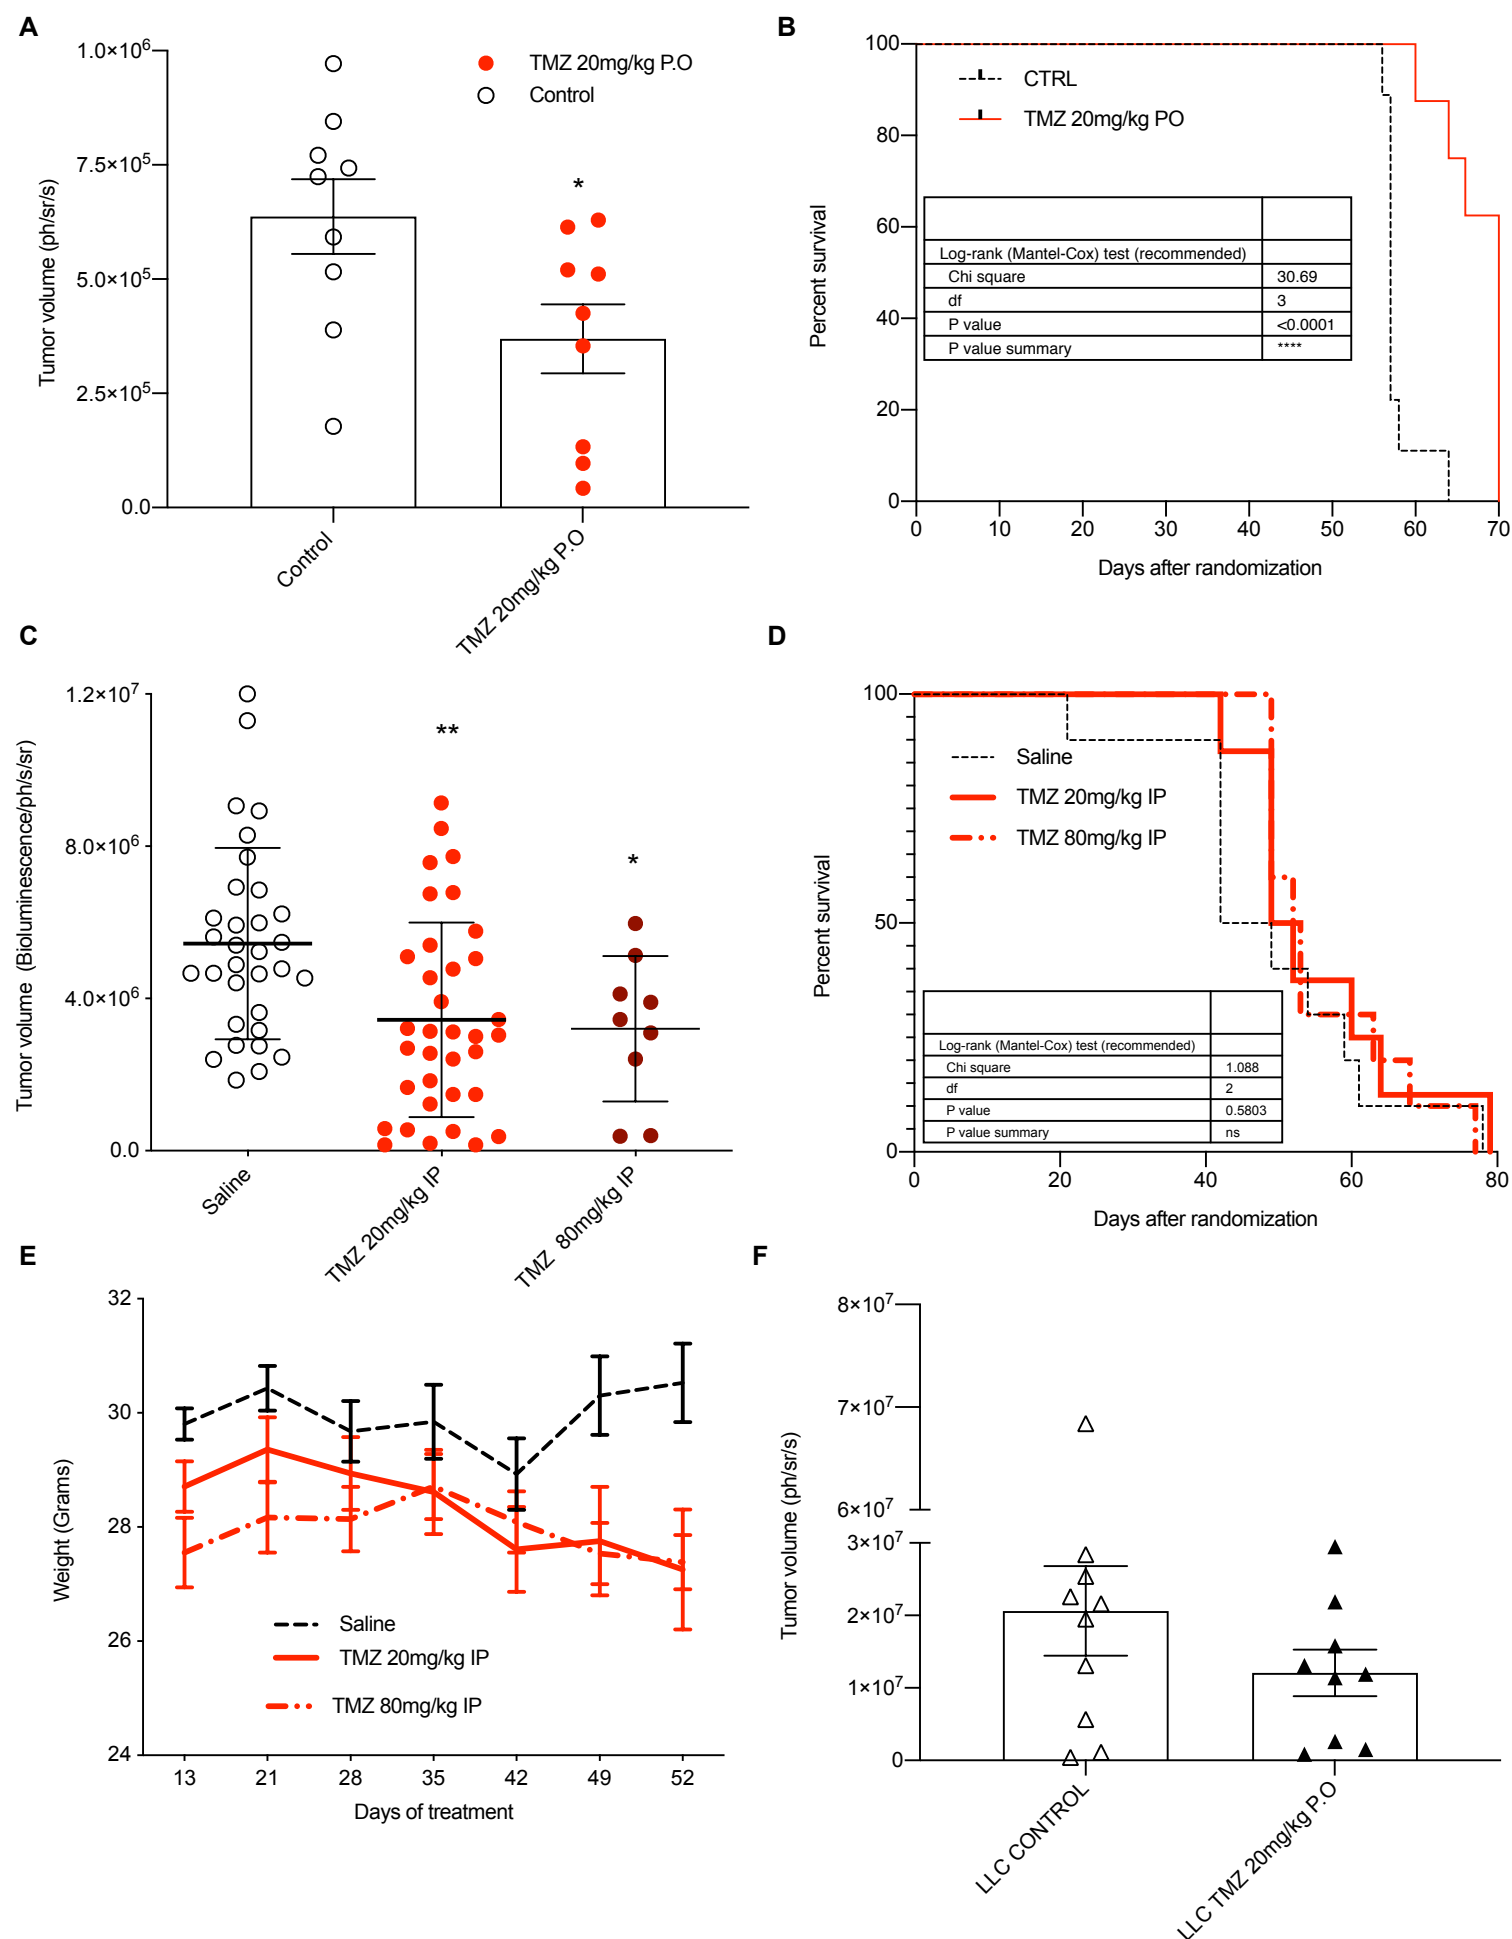

**Figure S5. Anticancer effect of HADHA pharmacological inhibition using Trimetazidine administered by IP or PO on OX<sup>+</sup> LUAD . A)** Mice bearing orthotopic human lung adenocarcinomas obtained with OX<sup>+</sup>-LUAD\_A549 cells were treated with TMZ 20mg/kg per oral (P.O). The volume of orthotopic A549luc-OX<sup>+</sup> LUAD tumors was determined *in vivo* non-invasively using the luminescence signal. **B)** Survival curve obtained with TMZ 20mg/kg P.O treatment on A549 OX<sup>+</sup> LUADs. **C)** Effect of intraperitoneal injection (IP) of TMZ on OX<sup>+</sup> A549luc LUAD volume. TMZ 20mg/kg or TMZ 80mg/kg was injected daily by IP. **D)** Survival curve obtained using TMZ 20mg/kg or 80mg/kg IP showing no significant effect. **E)** Body weight alteration in the animals treated with TMZ 20mg/kg or 80mg/kg by IP injection. **F)** Effect of TMZ 20mg/kg per oral (PO) administration in a immunocompetent mouse LUAD model obtained with murine LLC lung cancer cells in syngenic animals. Values represent mean  $\pm$  SEM; N=10-30 for each group. \*P<0.05, \*\*P<0.01, \*\*\*P<0.001. Treated animals were compared to untreated group using One-way Anova with Dunett's multiple comparison test. Survival curves were compared using Log-rank (Mantel-Cox) test.

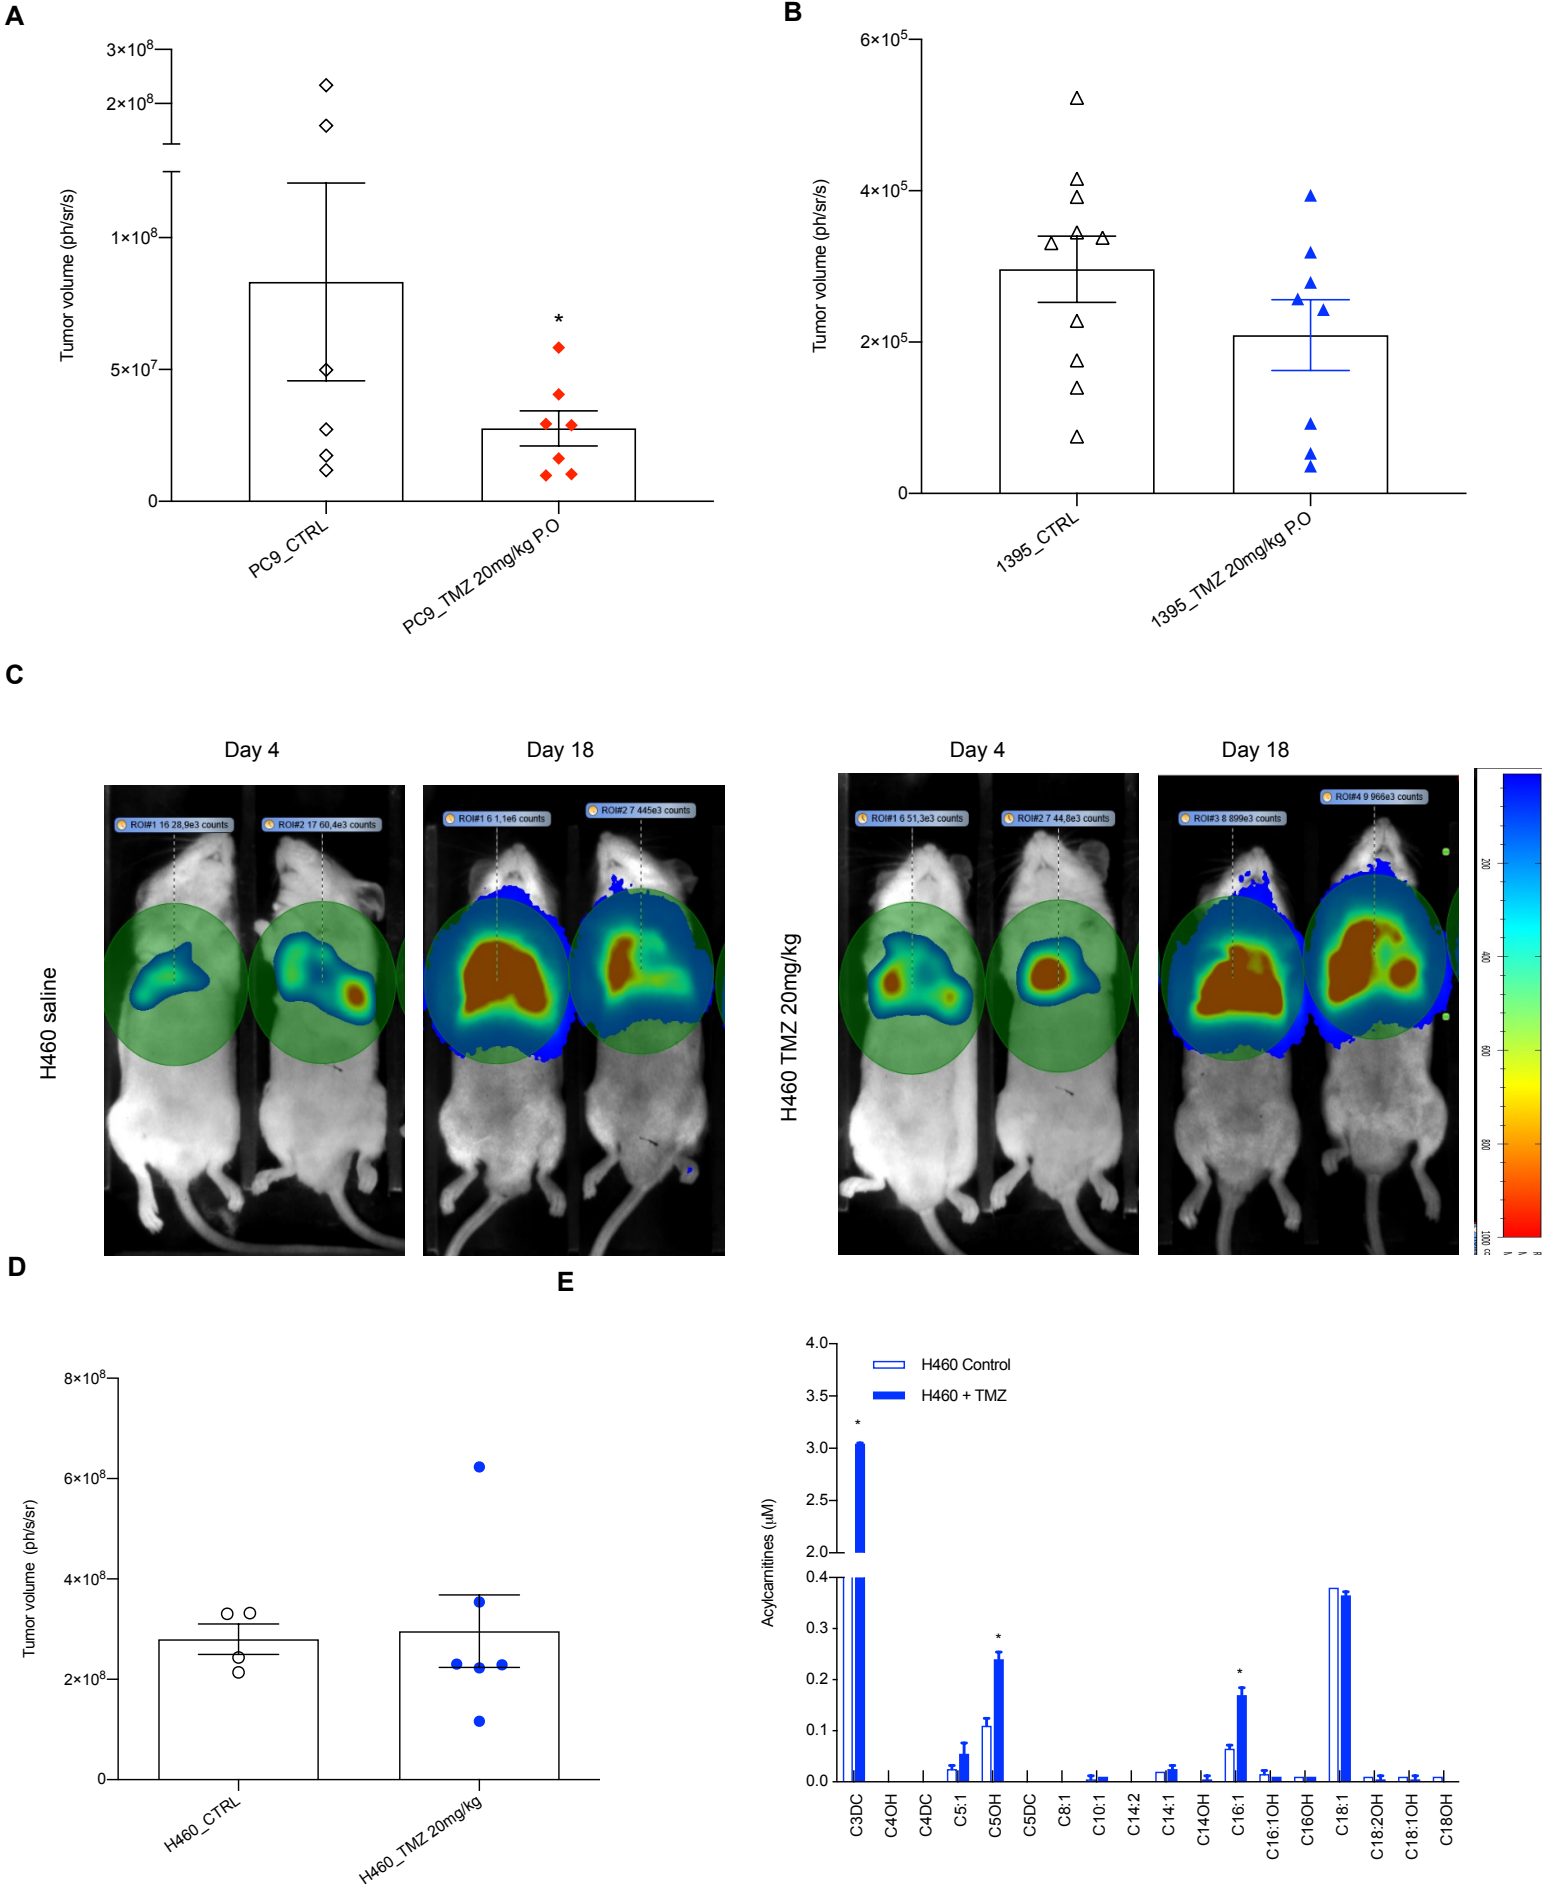

**Figure S6: TMZ inhibits specifically OX+ lung tumor growth.** Lung tumor growth was determined by the bioluminescence of human cancer cells injected orthotopically in the lung of NSG mice, after 18 days of growth. **A)** Results for the HADHA+/OX+ PC9 NSCLC cells and **B)** for the HADHA- / OX- 1395 cells. The animals were treated with vehicle or TMZ (20 mg/kg) daily P.O for 18 d ( $n = 10$  mice per group). **C and D)** Relative volume of HADHA-/OX- H460 orthotopic tumors determined in mice treated with vehicle (saline) or TMZ (20 mg/kg) daily for 18 d ( $n = 10$  mice per group). **E)** Lipidomic analysis (mass spectrometry) of fatty-acids accumulating in H460 cells (OX-) cells treated with 500 $\mu$ M TMZ during 48 hours. Values represent mean  $\pm$  SEM;  $N=4-6$ ;  $N=10$  *in vivo* experiments for each group. \* $P<0.05$ , \*\* $P<0.01$ , \*\*\* $P<0.001$ . Treated animals were compared to untreated group using a unpaired t-test.

**A**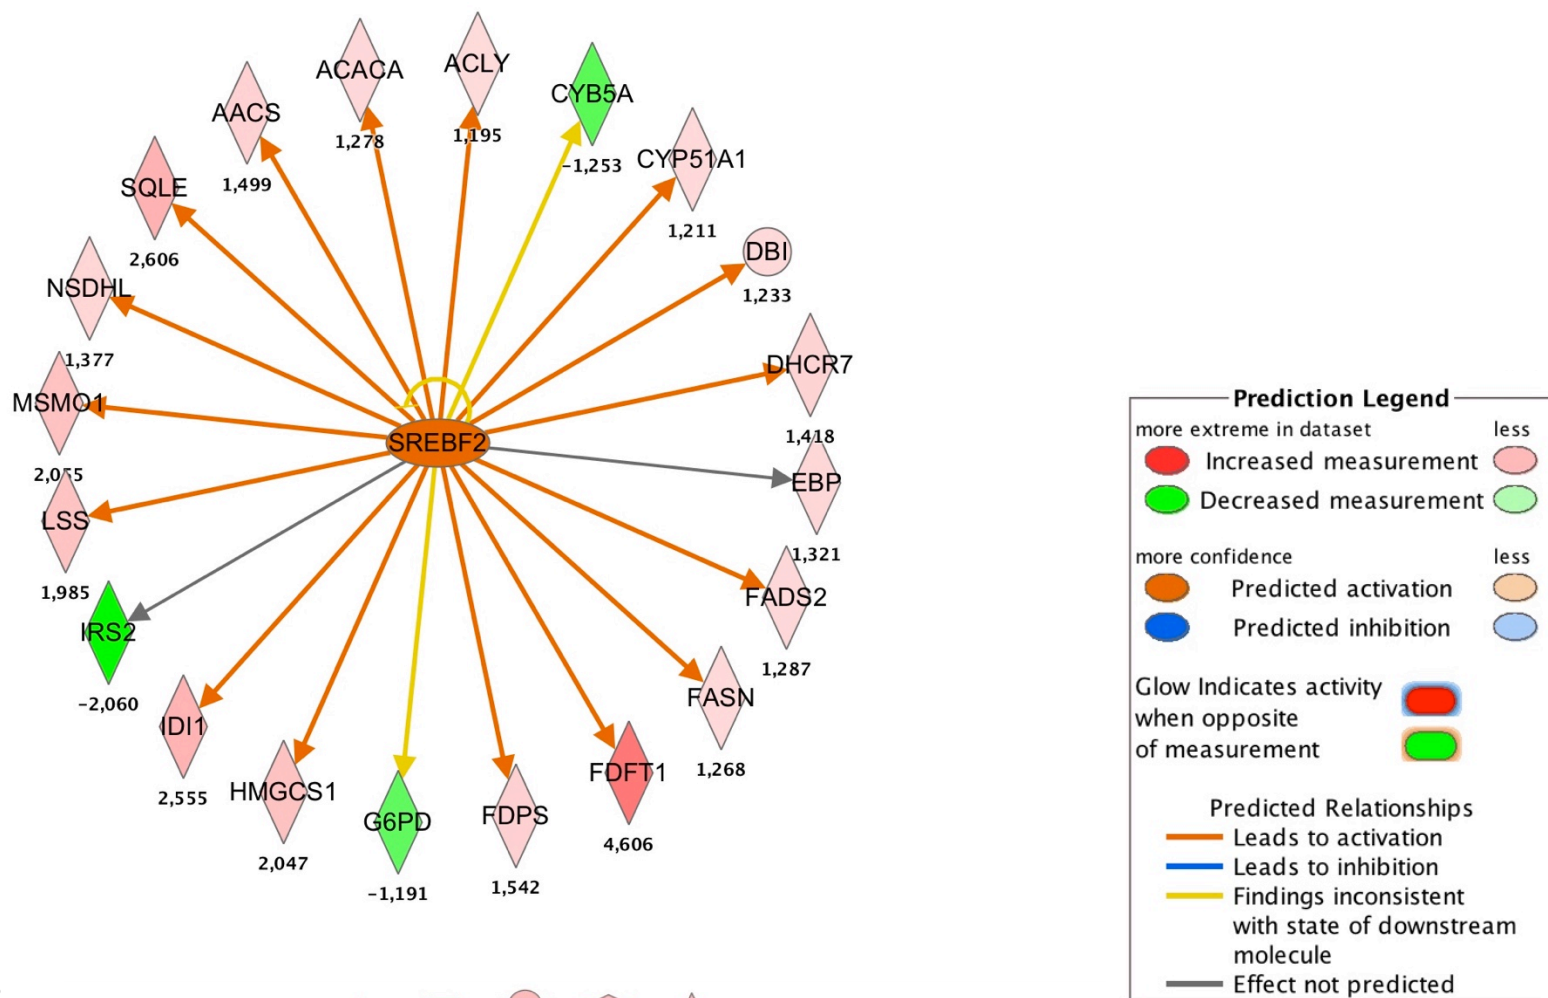**B**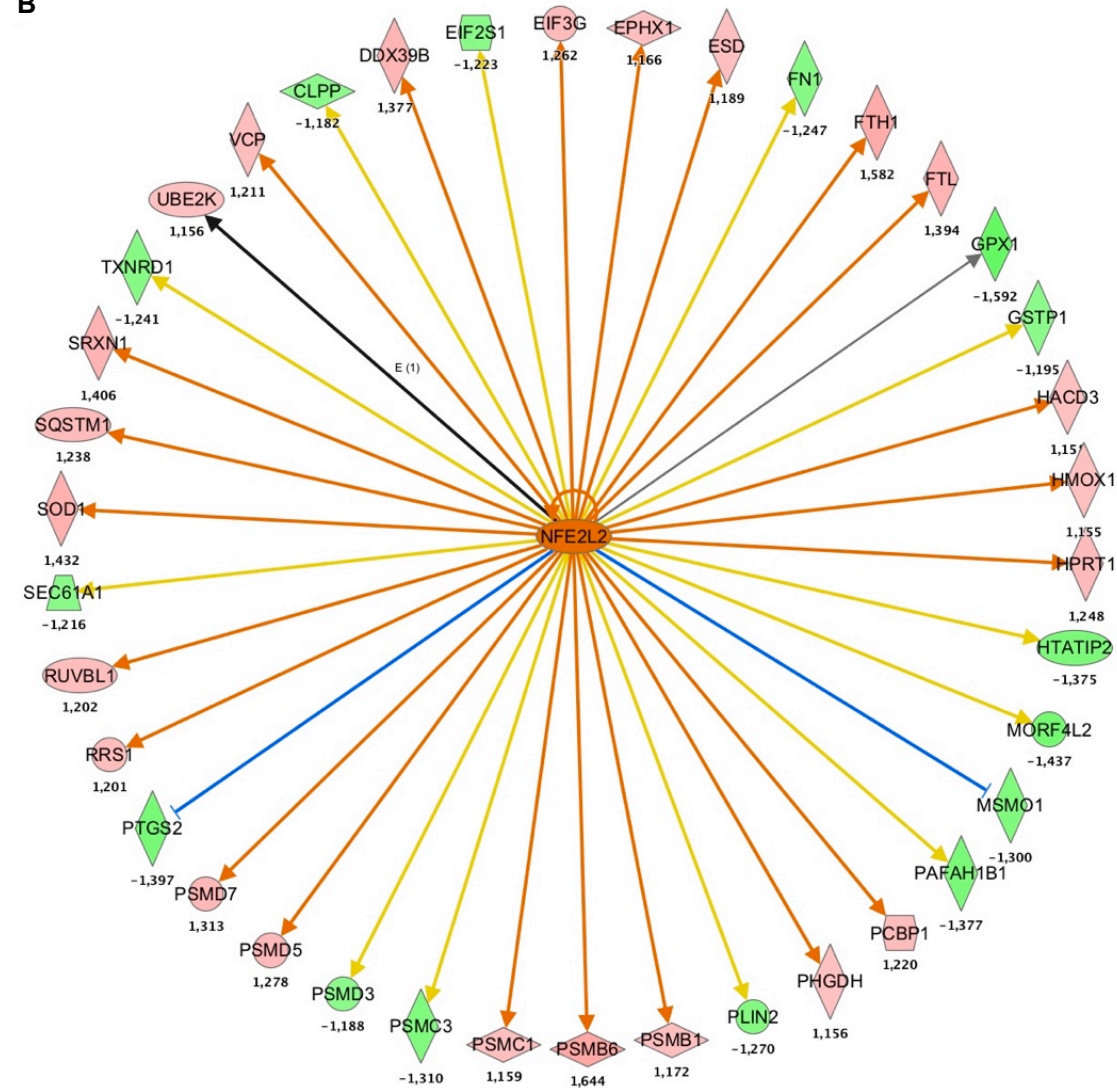

**Figure S7: Predicted transcription factors activated following HADHA inhibition using TMZ or shHADHA in human lung adenocarcinoma A549 cells. (A) SREBF2. (B) NRF2. The prediction analysis was performed using IPA (Qiagen). The proteins altered by HADHA inhibition ( $p < 0.05$ ) were analyzed using the 'upstream analysis' module of IPA.**

**Full unedited gels  
(Amoedo N.D et al.)**



**Figure 3 (uncropped)**

*Gel #1 HADHA NSCLC cell lines*

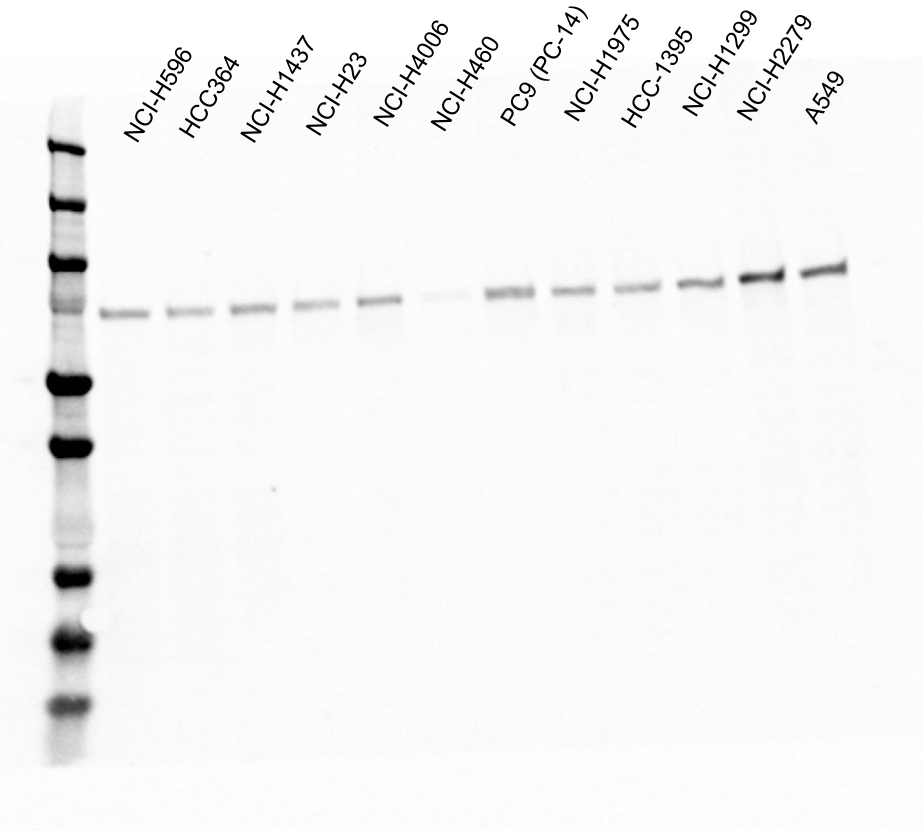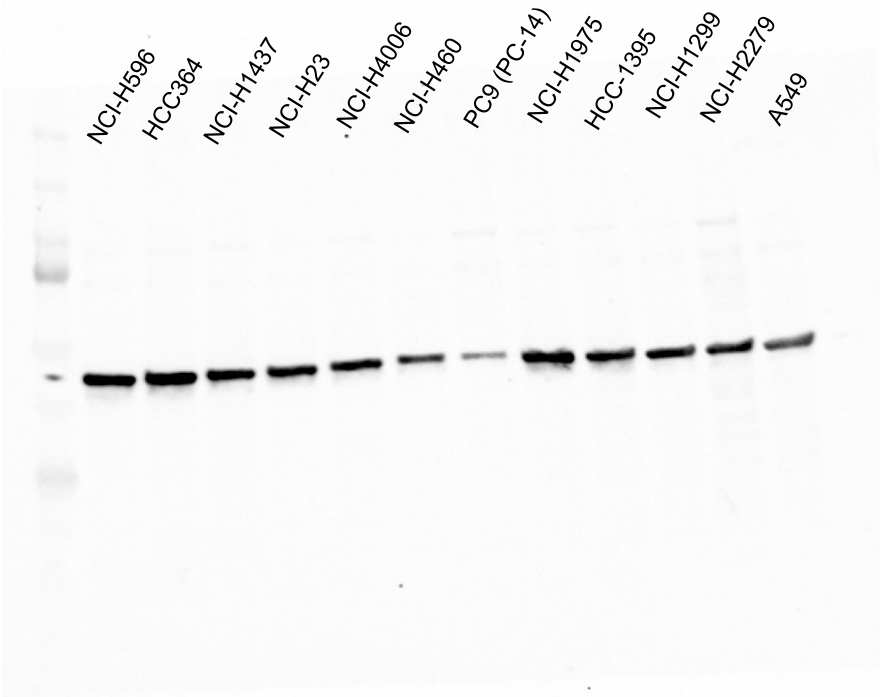

**Figure 3 (uncropped)**

*Gel #2 HADHA NSCLC cell lines*

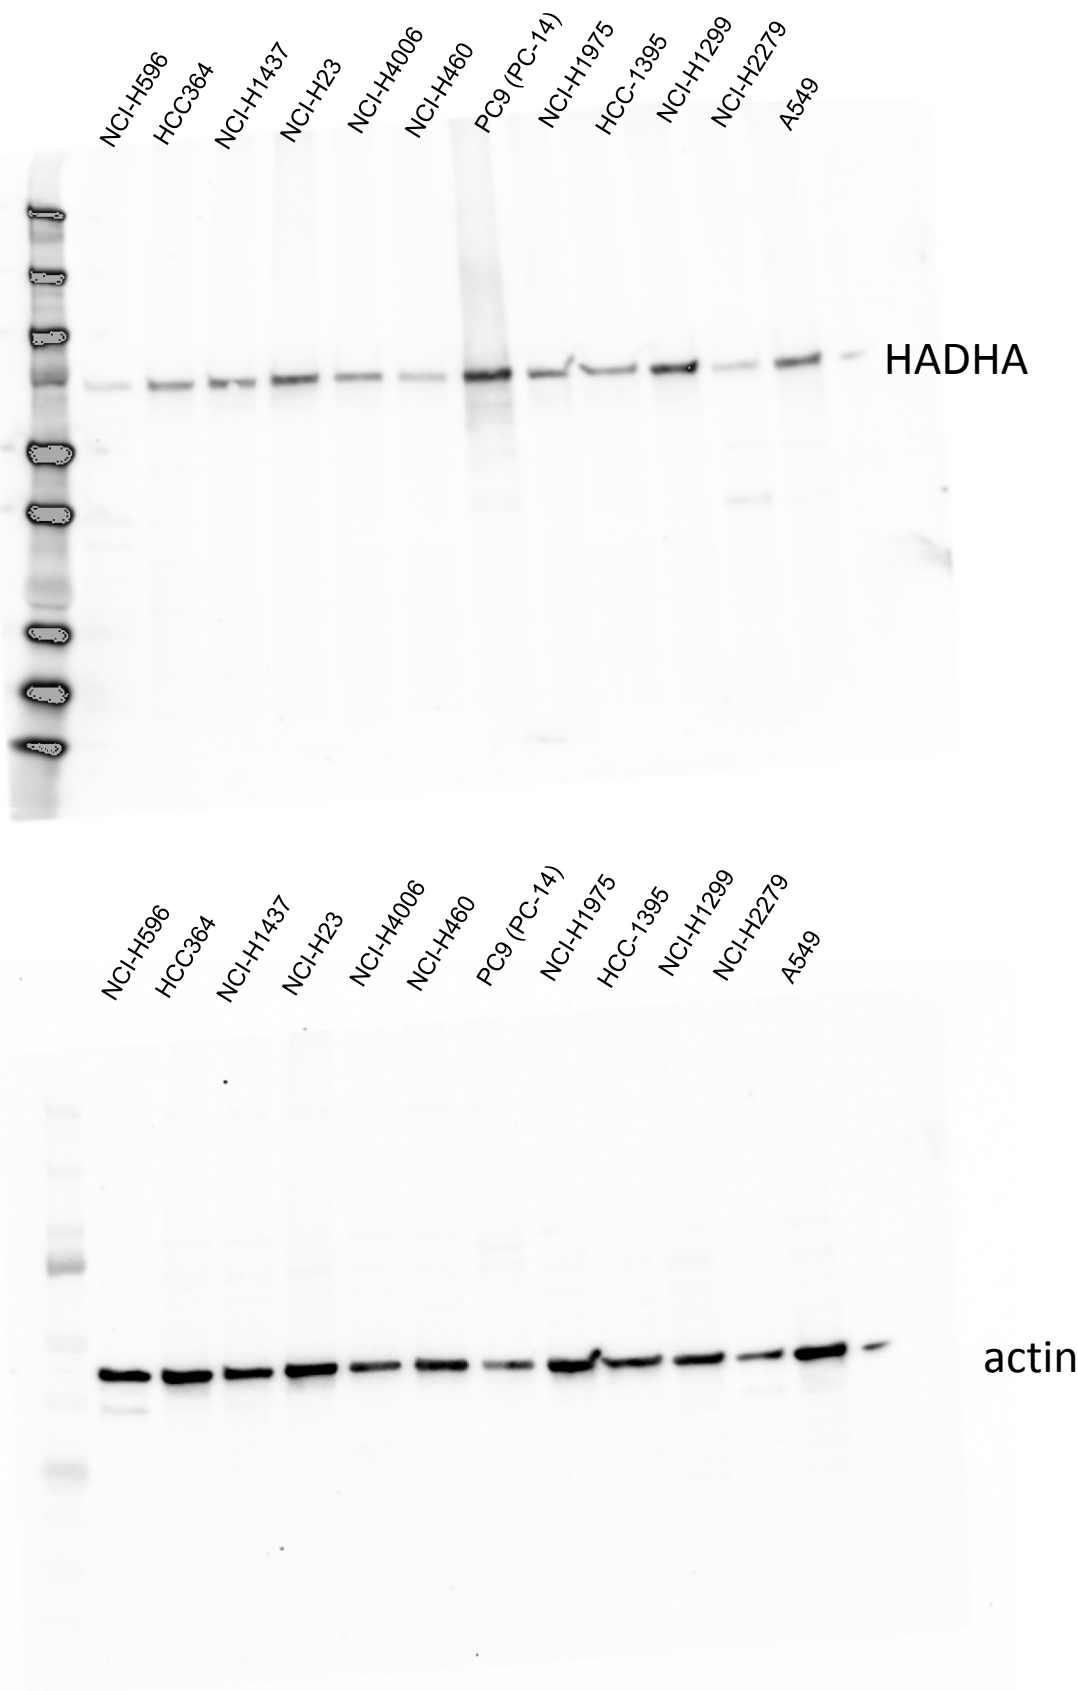

**Figure 3** (uncropped)

*Gel #3 HADHA NSCLC cell lines*

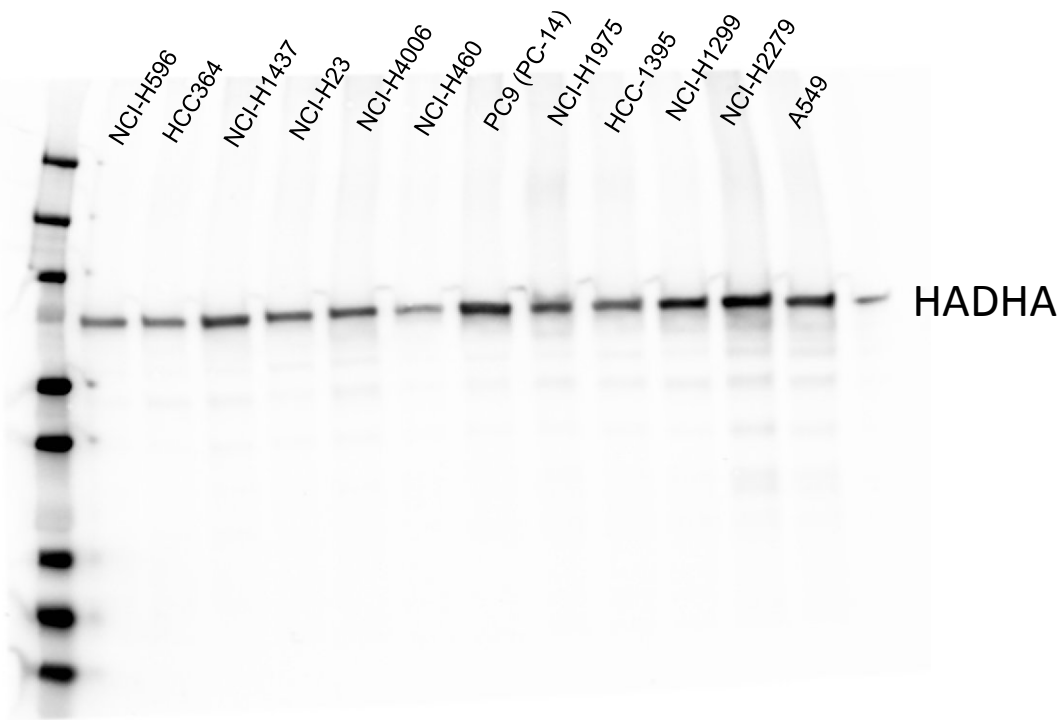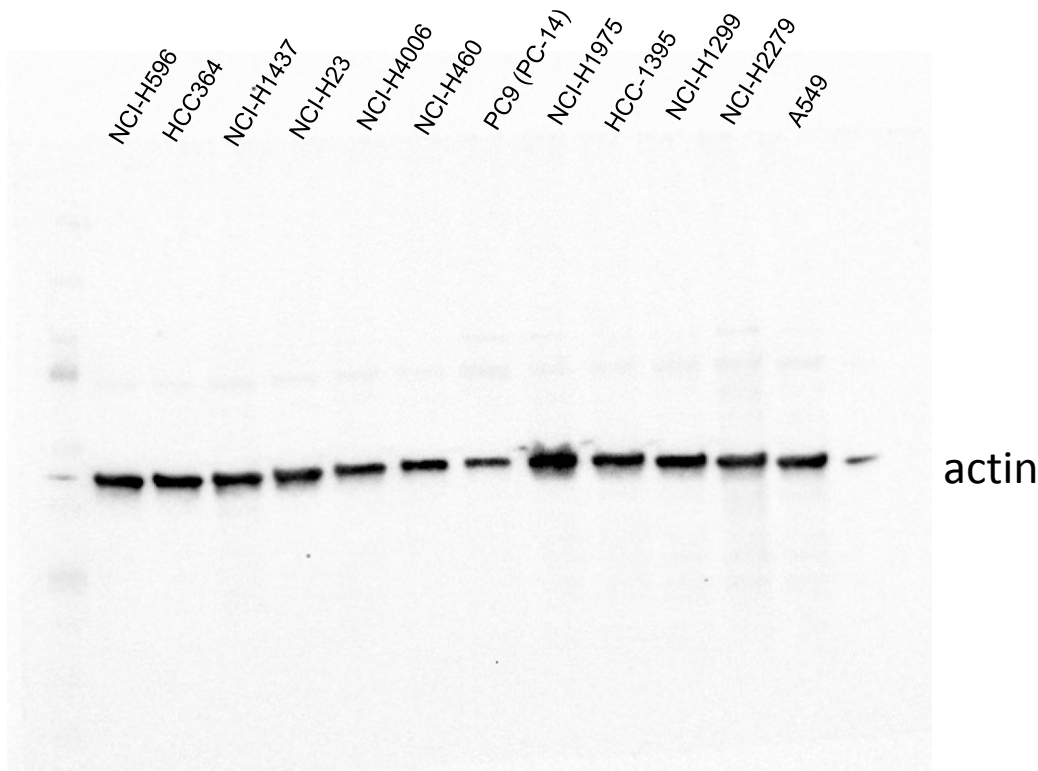

**Figure S4 (uncropped)**

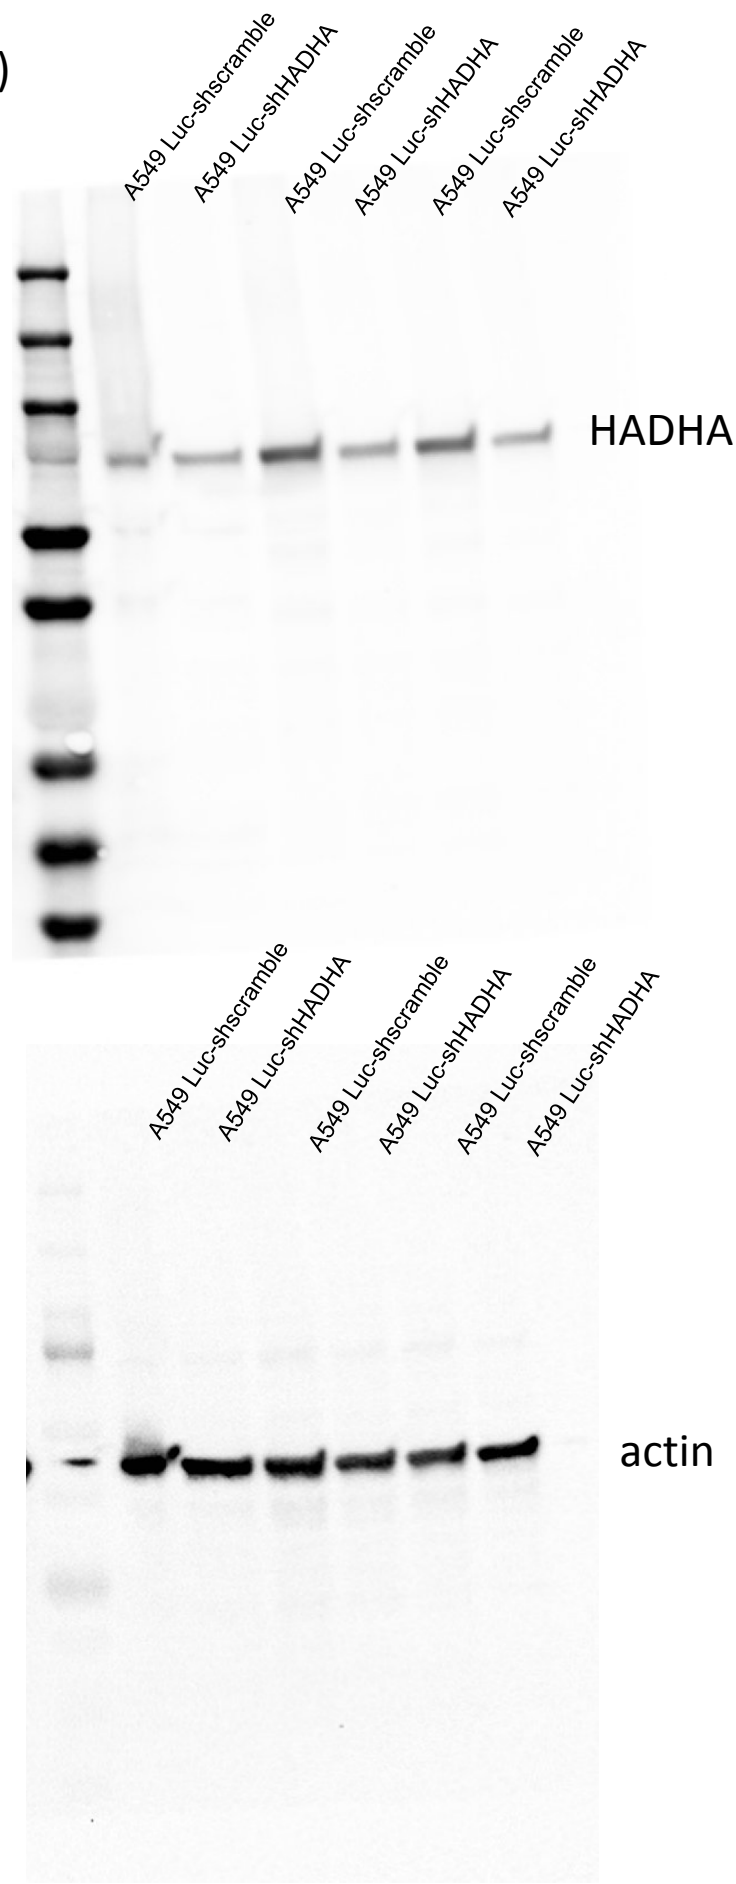



**Figure 6 (uncropped)**

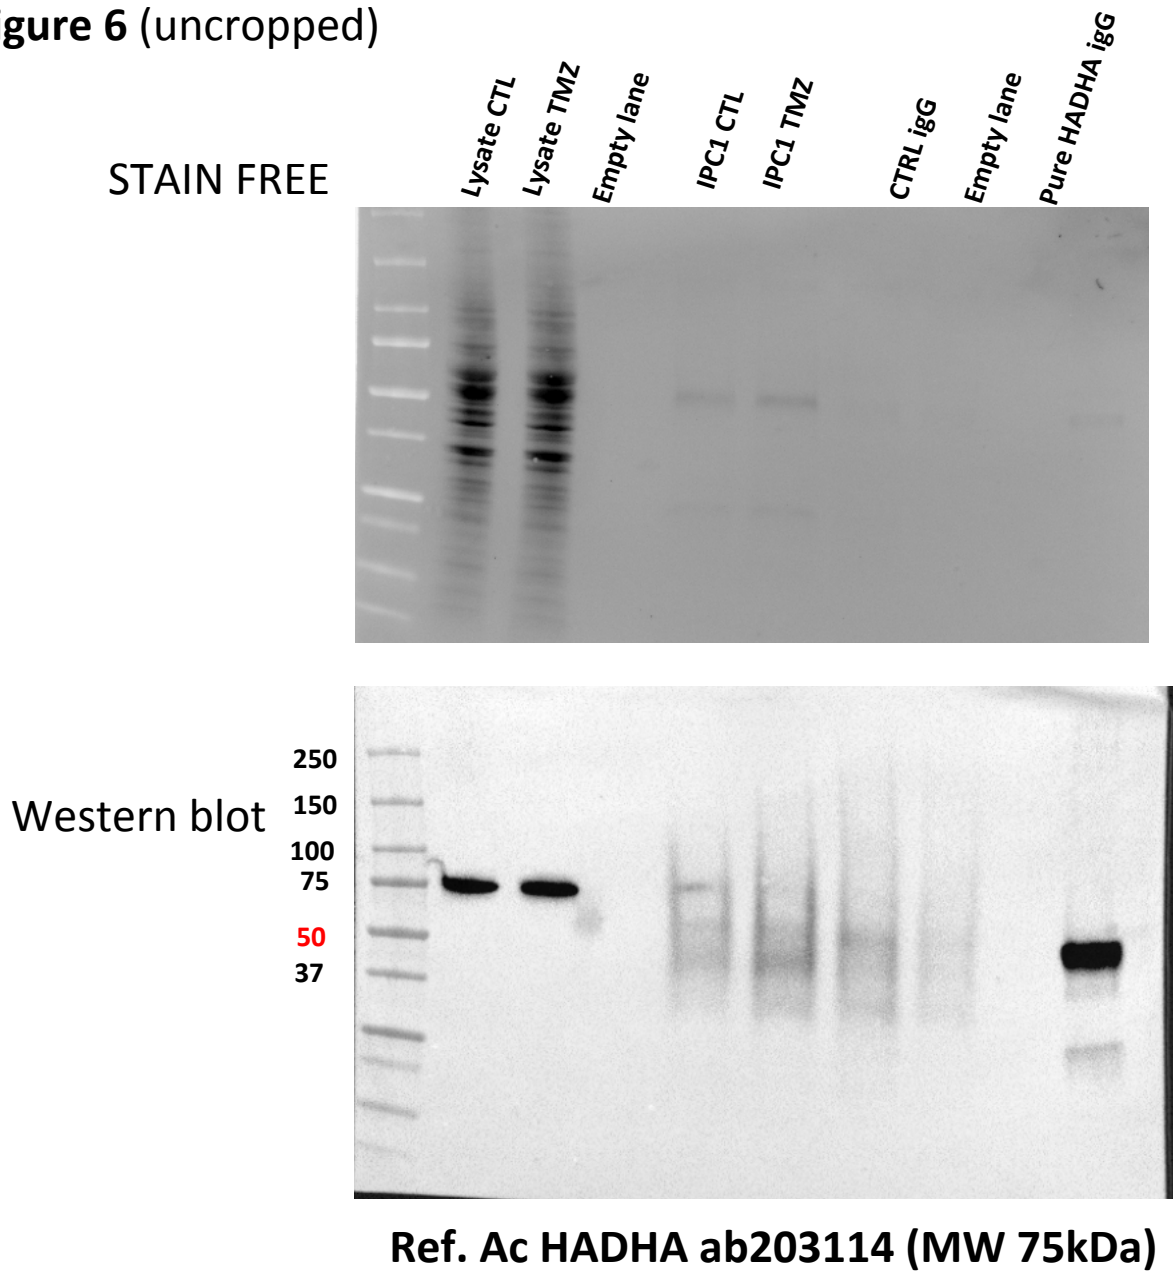

Supplement: sd1 [file 1]
